# Supplementary material for: Predictive thermodynamics for ionic solids and liquids
Source: Royal Society of Chemistry journal article supplement (doi:10.1039/c6cp00235h), 2016-01-01
Supplement: c6cp00235h1.pdf [file c6cp00235h1.pdf]

**Electronic Supplementary Information**

**Predictive Thermodynamics for Ionic Solids and Liquids**

**Leslie Glasser\* and H. Donald Brooke Jenkins\***

Nanochemistry Research Institute, Department of Chemistry,  
Curtin University, Perth 6845, Western Australia

E-mail: [l.glasser@curtin.edu.au](mailto:l.glasser@curtin.edu.au)

and

Department of Chemistry, University of Warwick, Coventry,  
West Midlands CV4 7AL, United Kingdom

E-mail: [h.d.b.jenkins@warwick.ac.uk](mailto:h.d.b.jenkins@warwick.ac.uk)

**1 Figure**

**3 Schemes**

**5 Tables**

\*Corresponding authors

L. Glasser: Telephone: + 61 8 9848-3334 Fax: + 61 8 9266-4699

H. D. B. Jenkins: Telephone: +44 2476-466-747 or +44 2476-523-265

Fax: +44 2476-466-747 or + 44 2476-524-112

## **Bibliography of some current Group Method publications (which also include the group parameters) for Pure Condensed-Phase Thermodynamics**

Leading reference: N. Cohen and S. W. Benson, "Estimation of heats of formation of organic compounds by additivity methods", *Chem. Rev.*, 1993, **93**, 2419-2438.

### **Ionic materials**

- (1) J. A. Chermak and J. D. Rimstidt, "Estimating the thermodynamic properties ( $\Delta G_f^\circ$  and  $\Delta H_f^\circ$ ) of silicate minerals at 298 K from the sum of polyhedral contributions", *Am. Miner.*, 1989, **74**, 1023-1031.
- (2) R. G. Berman, "Internally-consistent thermodynamic data for minerals in the system  $\text{Na}_2\text{O}-\text{K}_2\text{O}-\text{CaO}-\text{MgO}-\text{FeO}-\text{Fe}_2\text{O}_3-\text{Al}_2\text{O}_3-\text{SiO}_2-\text{TiO}_2-\text{H}_2\text{O}-\text{CO}_2$ ", *J. Petrol.*, 1988, **29**, 445-522.
- (3) T. J. B. Holland, "Dependence of entropy on volume for silicate and oxide minerals: a review and predictive model", *Am. Miner.*, 1989, **74**, 5-13.
- (4) M. Ducos and H. Sannier, "Méthode d'estimation des enthalpies de formation et des enthalpies libres de formation des composés inorganiques", *Thermochim. Acta*, 1992, **196**, 27-43.
- (5) C. D. Ratkey and B. K. Harrison, "Prediction of enthalpies of formation for ionic compounds", *Ind. Eng. Chem.*, 1992, **31**, 2362-2369.
- (6) A. T. M. Golam Mostafa, James M. Eakman and Stephen L. Yarbrow, "Prediction of Standard Heats and Gibbs Free Energies of Formation of Solid Inorganic Salts from Group Contributions" *Ind. Eng. Chem. Res.* **1995**, *34* (12), 4577-4582.
- (7) A. T. M. Golam Mostafa, James M. Eakman, Mark M. Montoya and Stephen L. Yarbrow, "Prediction of heat capacities of solid inorganic salts from group contributions", *Ind. Eng. Chem. Res.*, 1996, **35**, 343 – 348.
- (8) J. Leitner, P. Chuchvalec, D. Sedmidubsky, A. Strejc and P. Abrman, "Estimation of heat capacities of solid mixed oxides", *Thermochim. Acta*, 2003, **395**, 27-46.

### **Volume, density and radii**

Leading reference: G. Piacenza, G. Jacob and R. Gallo, "The prediction of density", *Adv. Quant. Struct.-Prop. Relations.*, 2002, **3**, 67-107.

- (9) C. H. Suresh and N. Koga, "A consistent approach to atomic radii", *J. Phys. Chem. A*, 2001, **105**, 5940-5944.

- (10) Y. H. Zhao, M. H. Abraham and A. M. Zissimos, "Determination of McGowan volumes for ions and correlations with van der Waals volumes", *J. Chem. Inf. Comput. Sci.*, 2003, **43**, 1848-1854.
- (11) Y. H. Zhao, M. H. Abraham and A. M. Zissimos, "Fast calculations of van der Waals volume as a sum of atomic and bond contributions and its application to drug compounds", 2003, **68**, 7368-7373.
- (12) H. K. Roobottom, H. D. B. Jenkins, J. Passmore and L. Glasser, "Thermochemical radii of complex ions", *J. Chem. Educ.*, 1999, **76**, 1570-1573.
- (13) D. W. M. Hofmann, "Fast estimation of crystal densities", *Acta Cryst. B*, 2002, **57**, 489-493.
- (14) S. Beaucamp, N. Marchet, D. Mathieu and V. Agafonov, "Calculation of the crystal densities of molecular salts and hydrates using additive volumes for charged groups", *Acta Cryst. B*, 2003, **59**, 498-504.
- (15) H. L. Ammon, "New atom/functional group volume additivity data bases for the calculation of the crystal densities of C-, H-, N-, O-, F-, S-, P-, Cl-, and Br-containing compounds", *Struct. Chem.*, 2001, **12**, 205-212.

### Thermodynamic properties

Leading references: J. C. Dearden, "The prediction of melting point", *Adv. Quant. Struct.-Prop. Relations.*, 1999, **2**, 127-175; M. Tesconi and S. H. Yalkowsky, "Melting Point", Chap. 1 in *Handbook of Property Estimation Methods for Chemicals: Environmental and Health Sciences*, R. S. Boethling and D. Mackay, Eds., CRC Press, Boca Raton, 2000.

Leading reference: M. Charton, "Phase change structure property quantitative relationships via intermolecular force parameters", *Adv. Quant. Struct.-Prop. Relations.*, 2002, **3**, 137-222 (properties: boiling point,  $T_b$ ; melting point,  $T_m$ ; critical temperature,  $T_C$ ).

- (16) C. Ouvrard and J. B. O. Mitchell, "Can we predict lattice energy from molecular structure?" *Acta Cryst. B*, 2003, **59**, 676-685.
- (17) J. S. Chickos and W. E. Acree, Jr., "Enthalpies of sublimation of organic and organometallic compounds. 1920-2001". *J. Phys. Chem. Ref. Data*, 2002, **31**, 537-698 (includes group property table for  $C_p$  of condensed phase).
- (18) J. S. Chickos, W. E. Acree, Jr. and J. F. Liebman, "Estimating solid-liquid phase change enthalpies and entropies", *J. Phys. Chem. Ref. Data*, 1999, **28**, 1535-1673. But, for a much simplified procedure, see A. Jain, G. Yang and S. H. Yalkowsky, "Estimation of total entropy of melting of organic compounds, *Ind. Eng. Chem.*, **2004**, 4376-4379.

- (19) W. A. Wakeham, G. St. Cholakov and R. P. Stateva, "Liquid density and critical properties of hydrocarbons estimated from molecular structure", *Chem. Eng. Data*, 2002, **47**, 559-570.
- (20) G. St. Cholakov, R. P. Stateva and W. A. Wakeham, "Estimation of normal boiling points of hydrocarbons from descriptors of molecular structure", *Fluid Phase Equilib.*, 1999, **163**, 21-42.
- (21) S. E. Stein and R. L. Brown, "Estimation of normal boiling points from group contributions", *Chem. Inf. Comput. Sci.*, 1994, **34**, 581-587.
- (22) E. S. Domalski and E. D. Hearing, "Estimation of the thermodynamic properties of hydrocarbons at 298.15 K", *J. Phys. Chem. Ref. Data*, 1988, **17**, 1637-1678.
- (23) G. J. Kabo, A. A. Kozyro and V. V. Diky, "Additivity of thermodynamic properties of organic compounds in the crystalline state. 1. Additive calculations for thermodynamic properties of alkanes, alkenes, alkanols, and alkanones", 1995, *J. Chem. Eng. Data*, 1996, **40**, 160-166.
- (24) J. S. Chickos and W. E. Acree, Jr., "Total phase change entropies and enthalpies. An update on their estimation and applications to the estimations of amphiphilic fluorocarbon-hydrocarbon molecules", *Thermochim. Acta*, 2003, **395**, 59-113.

## Thermodynamic Databases

There exist a large number of databases listing thermodynamic parameter values, densities, and crystal structures. These should provide the first resource in considering thermodynamic prediction, but VBT, TDR and SSA provide their backup, as both predictive procedures and checks of the listed values.

- (1) Haynes, W. M. (Editor-in-Chief), *CRC Handbook of Chemistry and Physics*, CRC Press, Boca Raton, 96th edn., 2015. Interactive online version: <http://www.chemnetbase.com/>
- (2) Wagman, D. D.; Evans, W. H.; Parker, V. B.; Schumm, R. H.; Nutall, R. L. *Selected Values of Chemical Thermodynamic Properties*, U. S. Dept. Commerce, National Bureau of Standards: Washington, D.C., 1982; also, Wagman, D. D.; Evans, W. H.; Parker, V. B.; Schumm, R. H.; Halow, I.; Bailey, S. M.; Churney, K. L.; Nutall, R. L. *The NBS Tables of Chemical Thermodynamic Properties, J. Phys. Chem. Ref. Data*, 1982, 11, Suppl. 2. (New edition of *NBS technical note no. 270 Selected values of chemical thermodynamic properties.*) Chase, Jr., M. W. *NIST-JANAF Thermochemical Tables*, 2 Vols., 4<sup>th</sup> ed., ca. 1998; *J. Phys. Chem. Ref. Data*, Monograph No. 9.
- (3) NIST database, <http://www.webbook.nist.gov/chemistry/>
- (4) Robie, R. A.; Hemingway, B. S.; Fisher, J. R. *Thermodynamic Properties of Minerals and Related Substances at 298.15 K and 1 Bar (10<sup>5</sup> Pascals) Pressure and at Higher Temperatures*, Geological Survey Bulletin 1452, U. S. Government Printing Office: Washington, D.C., 1978.
- (5) Saxena, S. K.; Chatterjee, N.; Fei, Y.; Shen, G. *Thermodynamic Data on Oxides and Silicates*, Springer: Berlin, 1993.
- (6) *HSC Chemistry for Windows*, Outotec Research Oy, Pori, Finland, version 7, 2007. 25 000 materials.
- (7) Barin, I. *Thermochemical Data of Pure Substances*, 3rd ed., 2 vols., VCH Publishing: Weinheim, 1995.
- (8) Stull, D. R.; Westrum, Jr., E. F.; Sinke, G. C. *The Chemical Thermodynamics of Organic Compounds*, Wiley, New York, 1969.
- (9) Landolt-Börnstein Tables, *Thermodynamic Properties of Organic Compounds and their Mixtures*, New Series, Group IV/8, Springer: New York, from 1995.

- (10) Landolt-Börnstein Tables, *Thermodynamic Properties of Inorganic Materials*, New Series, Group IV/19, Springer: New York, from 1999.
- (11) Springer Materials <http://www.springermaterials.com/navigation/> (“The World's Largest Resource for Physical & Chemical Data in Materials Science: 250,000 Substances & Material Systems | 3,000 Properties | 1,200,000 Literature Citations”)
- (12) Karapet'yants, M. Kh.; Karapet'yants, M. L. *Thermodynamic Constants of Inorganic and Organic Compounds*, Schmorak, J., transl., Ann Arbor – Humphrey Science Publishers, Ann Arbor, London, 1970.
- (13) Kelly, K. K.; King, E. G. *Contribution to the Data on Theoretical Metallurgy. XIV. Entropies of the Elements and Inorganic Compounds*, Bur. Mines. Bull., 592, Washington, 1959.
- (14) Pankratz, L.B.; Stuve, J. M.; Gokcen, N. a. *Thermodynamic Data for Mineral Technology*, U. S. Bur. Mines, Bulletin 677, Supt. of Docs., Washington, DC, 1984 (incorporates and supplements Bulletins 672 and 674).
- (15) King, E. G.; Weller, W. W., *U. S. Bur. Mines Rept. of Investig. 5590*, Dept. Interior, Washington, 1960.
- (16) Cox, J. D.; Pilcher G. *Thermochemistry of Organic and Organometallic Compounds*, Academic Press: London, 1970.
- (17) Cox, J. D.; Wagman, D. D.; Medvedev, V. A. *CODATA Key Values for Thermodynamics*, Hemisphere Pbl. Corp.: New York, 1989.
- (18) Frenkel, M., NIST Standard Reference Database 85, electronic database, Thermodynamics Research Center, Boulder, CO, 2001.
- (19) Daubert, T. E.; Danner, R. P.; Sibul, H. M.; Stebbins, C. C. *Physical and Thermodynamic Properties of Pure Compounds: Data Compilation*, extant 1994 (core with 4 supplements), Taylor & Francis: Bristol, PA.
- (20) Pedley, J. B.; Naylor, R. D.; Kirby S. P. *Thermochemical Data of Organic Compounds*, 2<sup>nd</sup> ed., Chapman & Hall: London, 1986.
- (21) Pedley, J. B. *Thermochemical Data and Structures of Organic Compounds*, Thermodynamic Research Center, Texas A & M Univ., College Station, TX, 1994.
- (22) Domalski, E. S.; Evans, W. H.; Hearing, E. D. *Heat Capacities and Entropies of Organic Compounds in the Condensed Phase*, *J. Phys. Chem. Ref. Data*, 13, suppl. 1, 1984; 19(4), 881-1047, 1990.

- (23) Gurvich, L. V.; Veyts, I. V.; Alcock, C. B.; Iorish, V. S. *Thermodynamic Properties of Individual Substances*, 4<sup>th</sup> ed. in 5 vols., Hemisphere Publ. Corp.: New York, 1991; CRC Press: Boca Raton, FL, 1994.
- (24) Yungman, V. S.; Glushko, V. P.; Medvedev, V. A.; Gurvich, L. V., eds., *Thermal Constants of Substances*, 8 vols., Wiley: New York, 1999.
- (25) Lide, D. R.; Kehiaian, H. V. *CRC Handbook of Thermophysical and Thermochemical Data*, CRC Press: Boca Raton, FL, 1994.
- (26) Knacke, O.; Kubaschewski, O.; Hesselmann, K., eds., *Thermochemical Properties of Inorganic Substances*, 2<sup>nd</sup> ed., Springer: Berlin, 1971.
- (27) Samsonov, G. V., ed., *The Oxide Handbook*, Plenum: New York, 1982.
- (28) Janz, G. J. *Thermodynamic Properties of Organic Compounds*, Revised Ed., Academic Press: New York, 1967.
- (29) Benson, S. W. *Thermochemical Kinetics*, 2<sup>nd</sup> ed., Wiley: New York, 1976.
- (30) Wilhoit, R. C.; Zwolinski, B. J. "Physical and Thermodynamic Properties of Aliphatic Alcohols", *J. Phys. Chem. Ref. Data*, 2, suppl. 1, 1973.
- (31) IUPAC Subcommittee for Gas Kinetic Data Evaluation: table of enthalpies of formation: <http://www.iupac-kinetic.ch.cam.ac.uk/Thermo2002.pdf>
- (32) Blanksby, S. J.; Ellison, G. B. "Bond Dissociation Energies of Organic Molecules", *Acc. Chem. Res.*, **2003**, 36, 225-263.
- (33) B. E. Poling, B. E., Prausnitz, J. M. and O'Connell, J. P. *The Properties of Gases and Liquids*, 5<sup>th</sup> ed., McGraw-Hill: 2001.
- (34) Binnewies, M. and Milke, E. *Thermochemical data of elements and compounds*, 2<sup>nd</sup> rev. and extended ed.. Weinheim ; Chichester : Wiley-VCH: ca 2002.
- (35) Marcus, Y. *Ion Properties*, Marcel Dekker, New York, 1997.
- (36) Marcus, Y. *Ions in Solution and their Solvation*, Wiley, 2015
